# Supplementary material
Source: PubMed Central journal article supplement (PMC6707905)

Supplemental Figure 1: Forest Plot for Anxiety Disorders

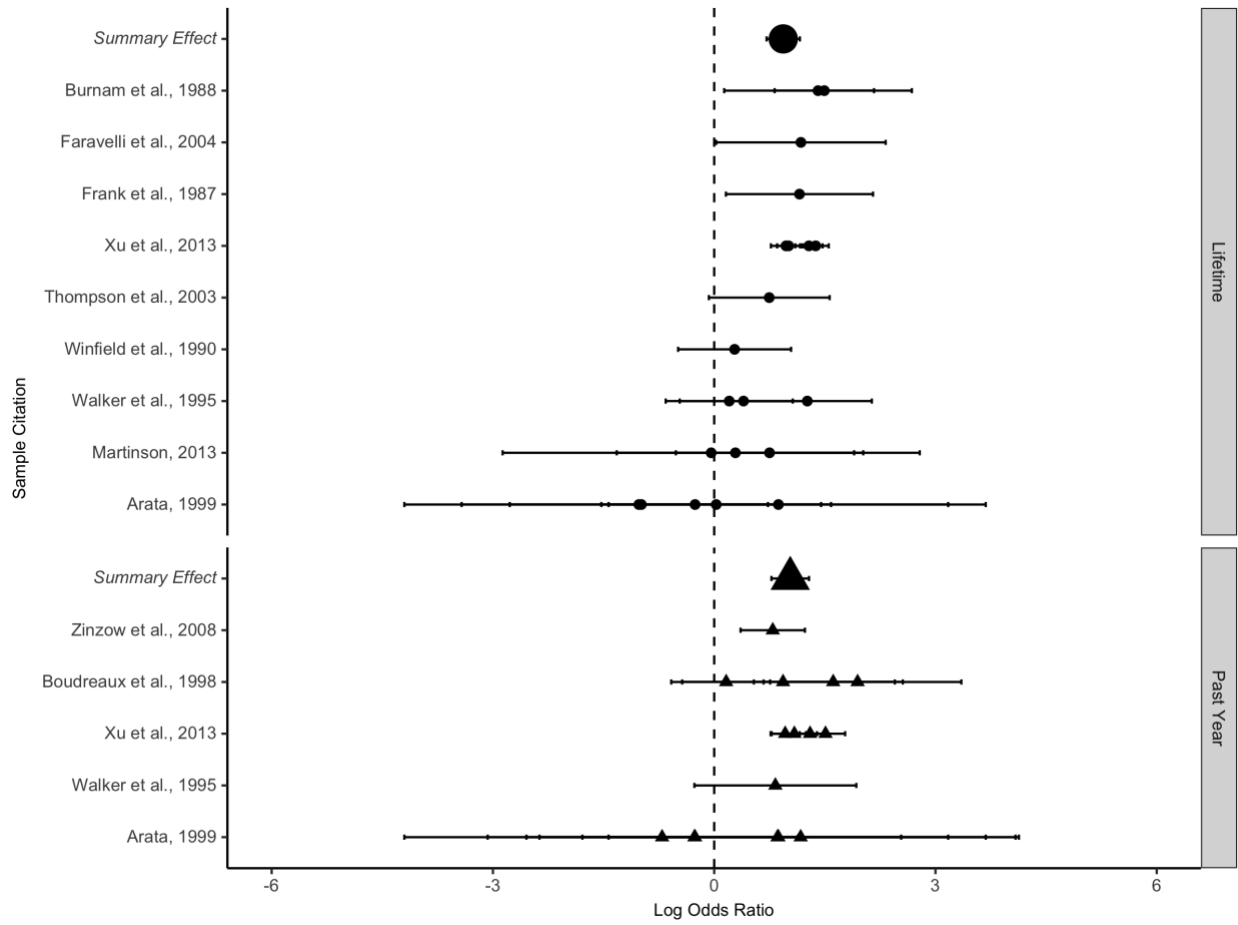

Supplemental Figure 2: Forest Plot for Bipolar Disorder

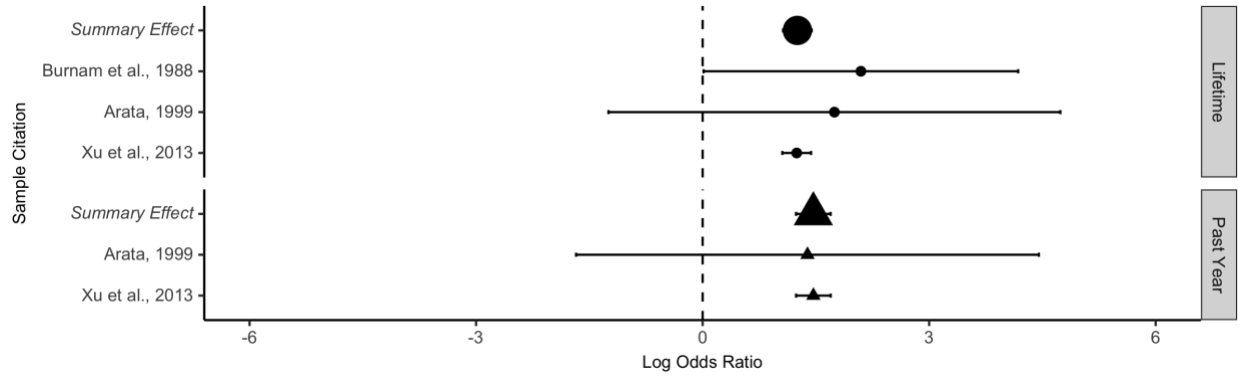

Supplemental Figure 3: Forest Plot for Depressive Disorders

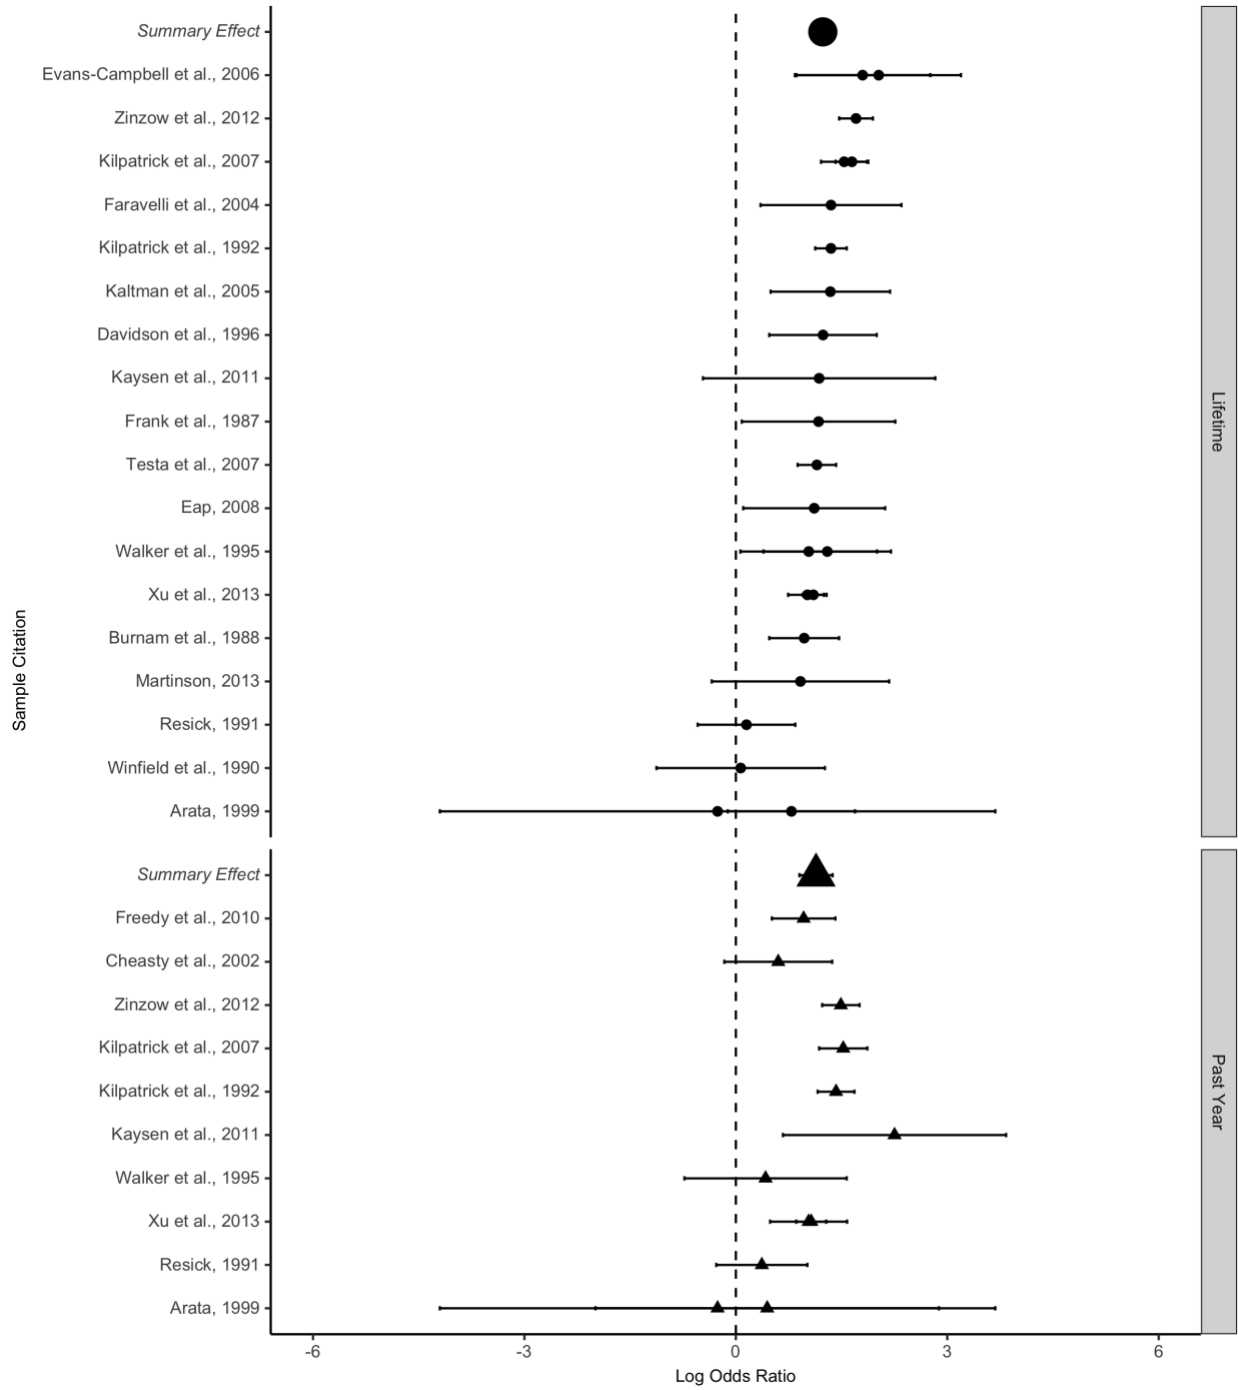

Supplemental Figure 4: Forest Plot for Eating Disorders

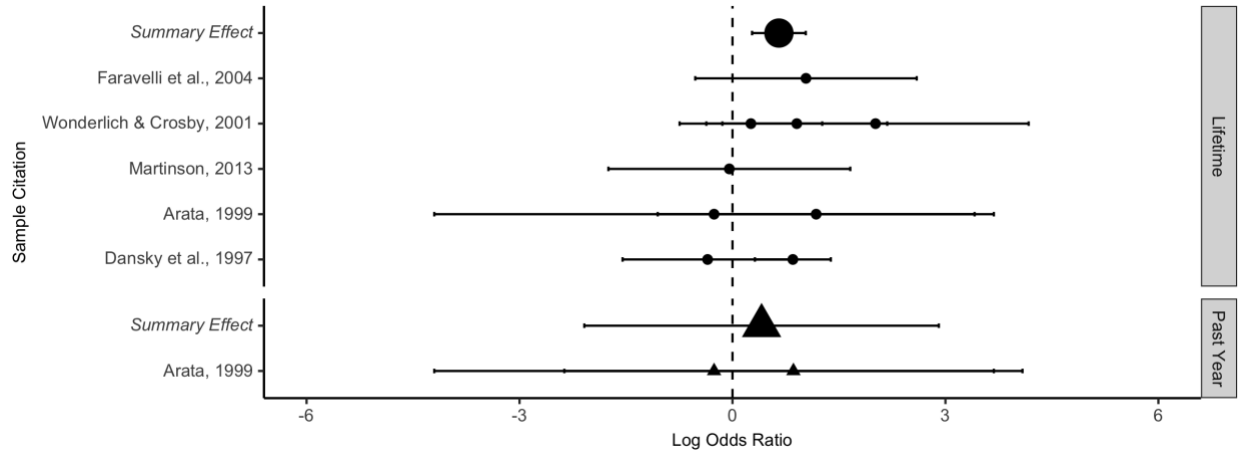

Supplemental Figure 5: Forest Plot for Obsessive-Compulsive Disorder

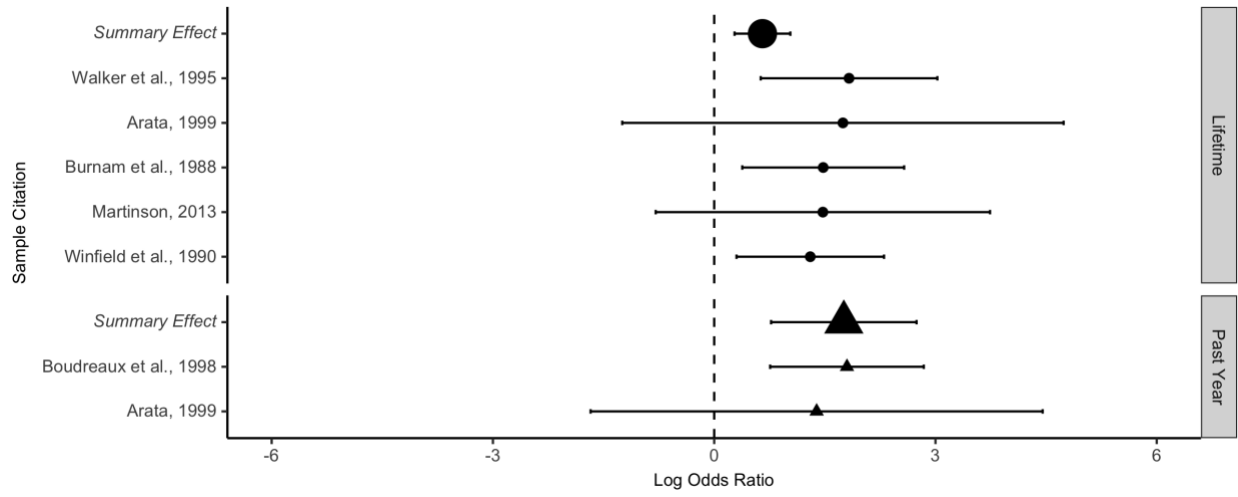

Supplemental Figure 6: Forest Plot for Posttraumatic Stress Disorder

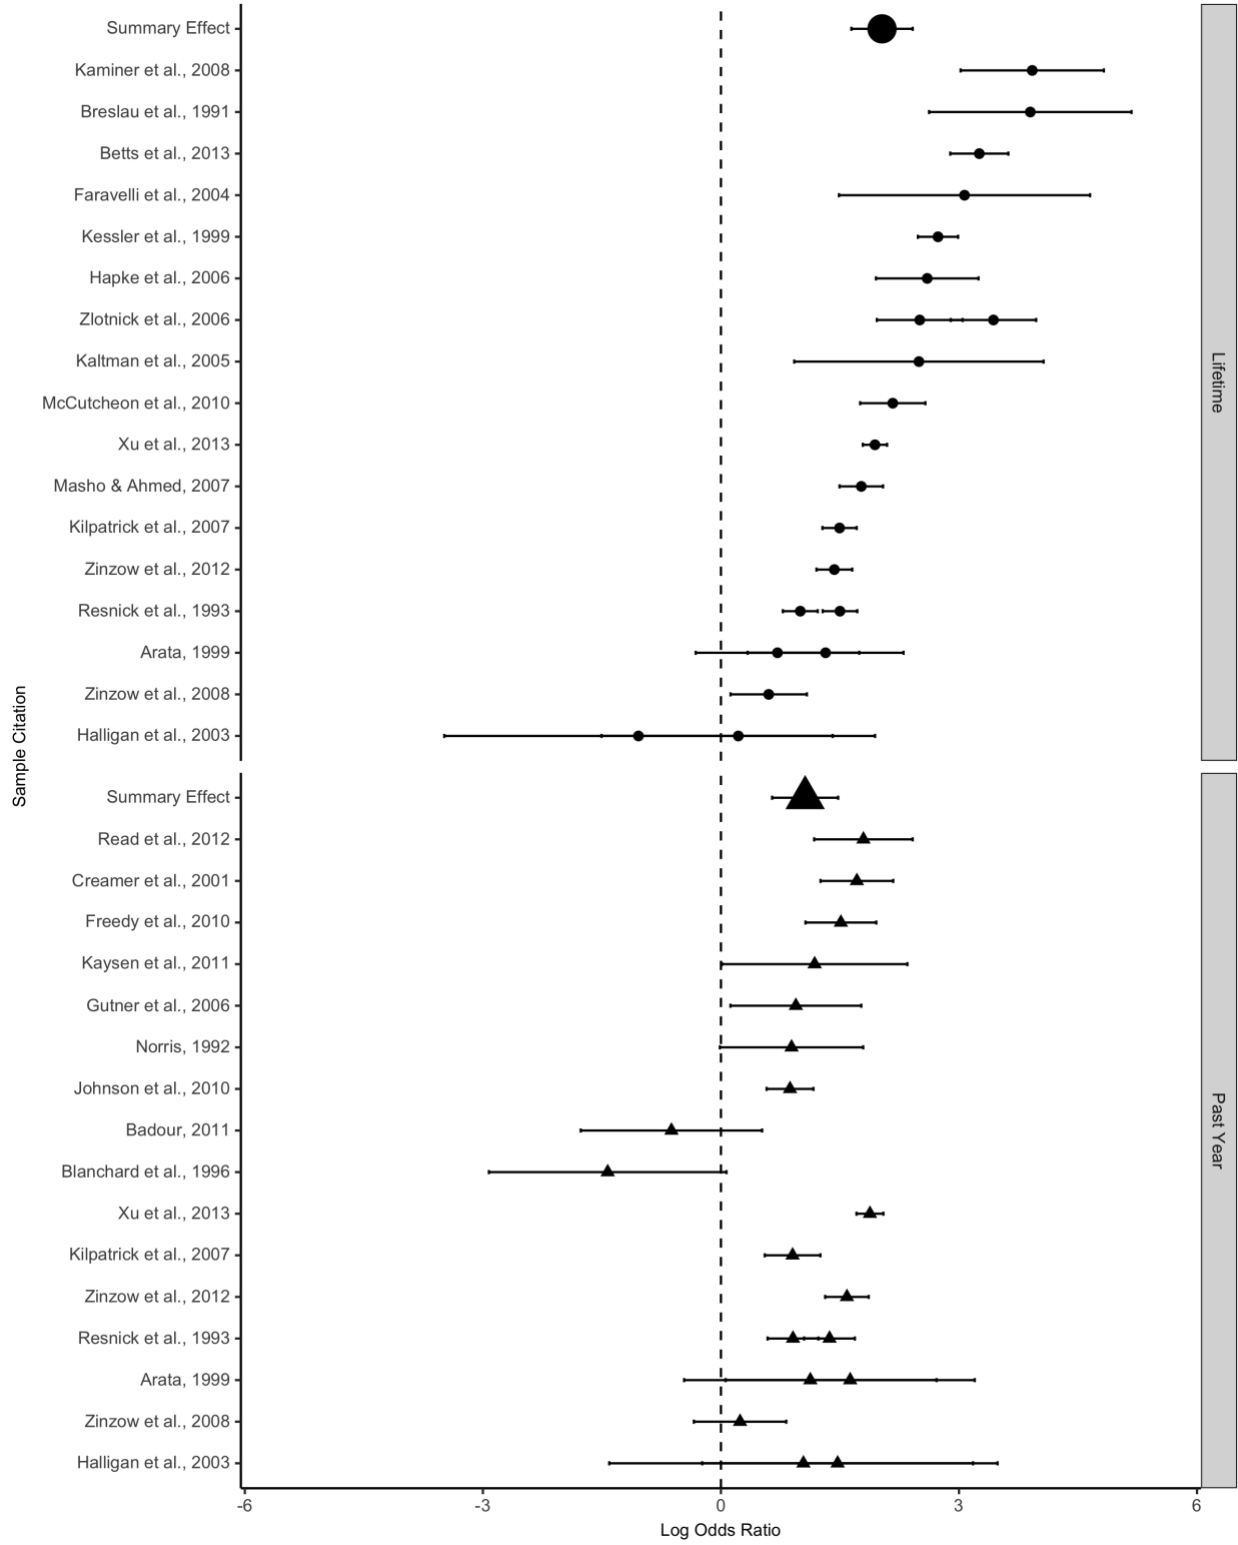

Supplemental Figure 7: Forest Plot for Substance Use Disorders

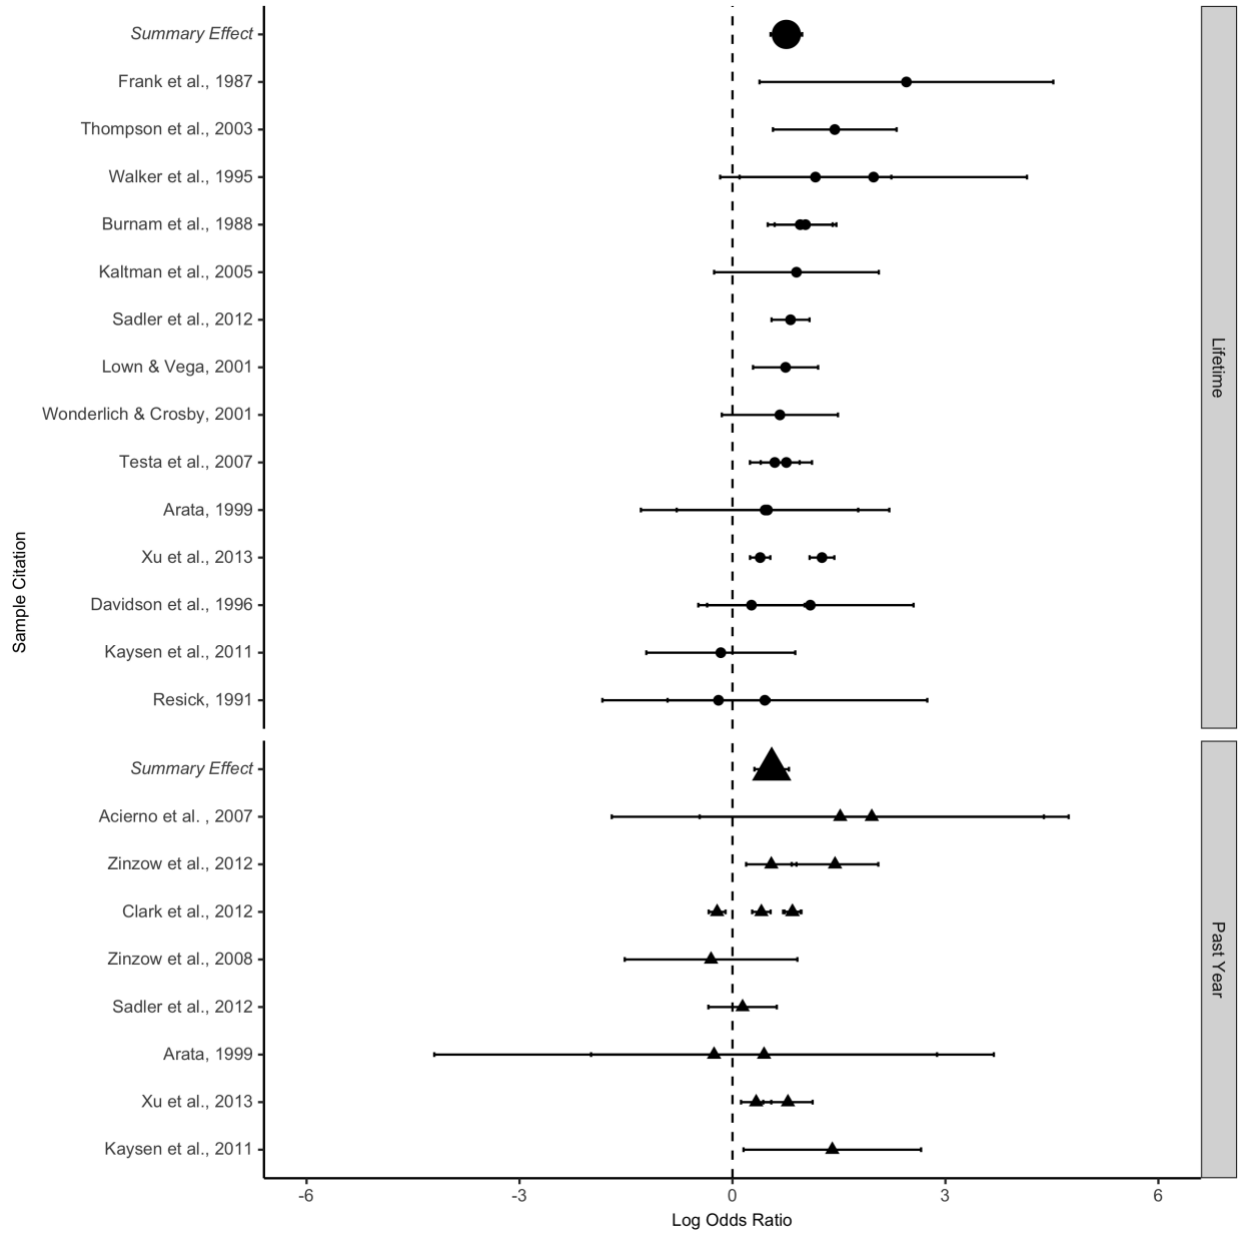

Supplement: NIHMS1035506-supplement-supplemental_figures.pdf [file NIHMS1035506-supplement-supplemental_figures.pdf]
